# Supplementary material for: Bicyclopeptides: a new class of ligands for Cu(ii) ions
Source: Royal Society of Chemistry journal article supplement (doi:10.1039/d2dt01497a), 2022-01-01
Supplement: d2dt01497a1.pdf [file d2dt01497a1.pdf]

# Bicyclopeptides: a new class of ligands for Cu(II) ions

## Supplementary materials

Aleksandra Marciniak<sup>a</sup>, Lorenzo Pacini<sup>b,c</sup>, Anna Maria Papini<sup>b,c</sup>, Justyna Brasuń<sup>a\*</sup>

<sup>a</sup> Department of Inorganic Chemistry, Wrocław Medical University, Borowska 211A, 50-556 Wrocław, Poland

<sup>b</sup> Interdepartmental Research Unit of Peptide and Protein Chemistry and Biology, Department of Chemistry “Ugo Schiff”, University of Florence, Via Della Lastruccia 13, 50019 Sesto Fiorentino, Italy

<sup>c</sup> MoD&LS Laboratory, University of Florence, Centre of Competences RISE, Via Madonna del Piano 6, 50019 Sesto Fiorentino, Italy

\*Correspondence: e-mail: justyna.brasun@umw.edu.pl, telephone: +48 71 784 03 30, fax number: +48 71 784 03 36, 0000-0001-6641-4853

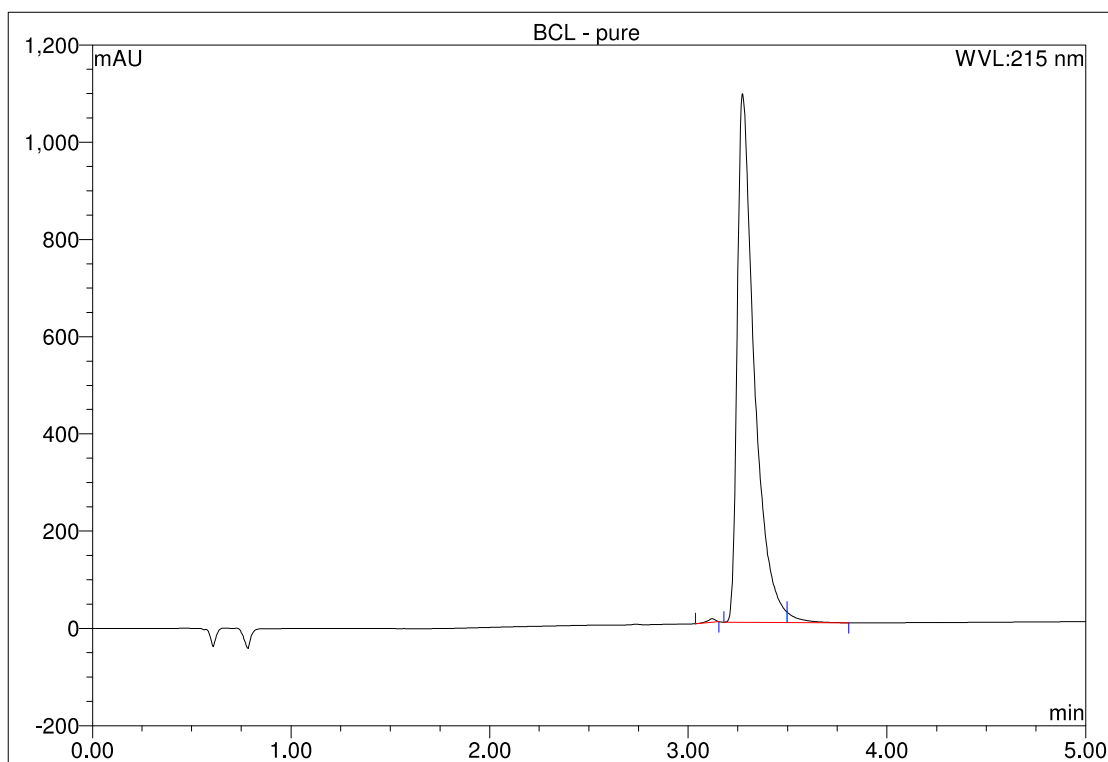

| No.           | Ret.Time<br>min | Peak Name | Height<br>mAU | Area<br>mAU*min | Rel.Area<br>% | Amount | Type |
|---------------|-----------------|-----------|---------------|-----------------|---------------|--------|------|
| 1             | 3.12            | n.a.      | 7.524         | 0.319           | 0.29          | n.a.   | BMB* |
| 2             | 3.27            | n.a.      | 1086.742      | 107.843         | 98.55         | n.a.   | BM * |
| 3             | 3.50            | n.a.      | 20.091        | 1.273           | 1.16          | n.a.   | MB*  |
| <b>Total:</b> |                 |           | 1114.357      | 109.434         | 100.00        | 0.000  |      |

**Figure S1.** RP-UHPLC trace of BCL peptide. Thermo Scientific Ultimate 3000 equipped with a diode array detector; C18 column Waters Acquity CSH™ (130Å, 1.7 μm, 2.1 × 100 mm); temperature 318.15°K; flow: 0.5 mL/min. Eluents: 0.1% TFA in H<sub>2</sub>O (A) and 0.1% TFA in CH<sub>3</sub>CN (B); λ 215 nm; gradient: 5-95% B in A in 5 min. Rt 3.27 min.
